# Supplementary material
Source: Royal Society of Chemistry journal article supplement (doi:10.1039/b104491p), 2001-10-29
Supplement: b104491p(1).doc [file b104491p%281%29.doc]

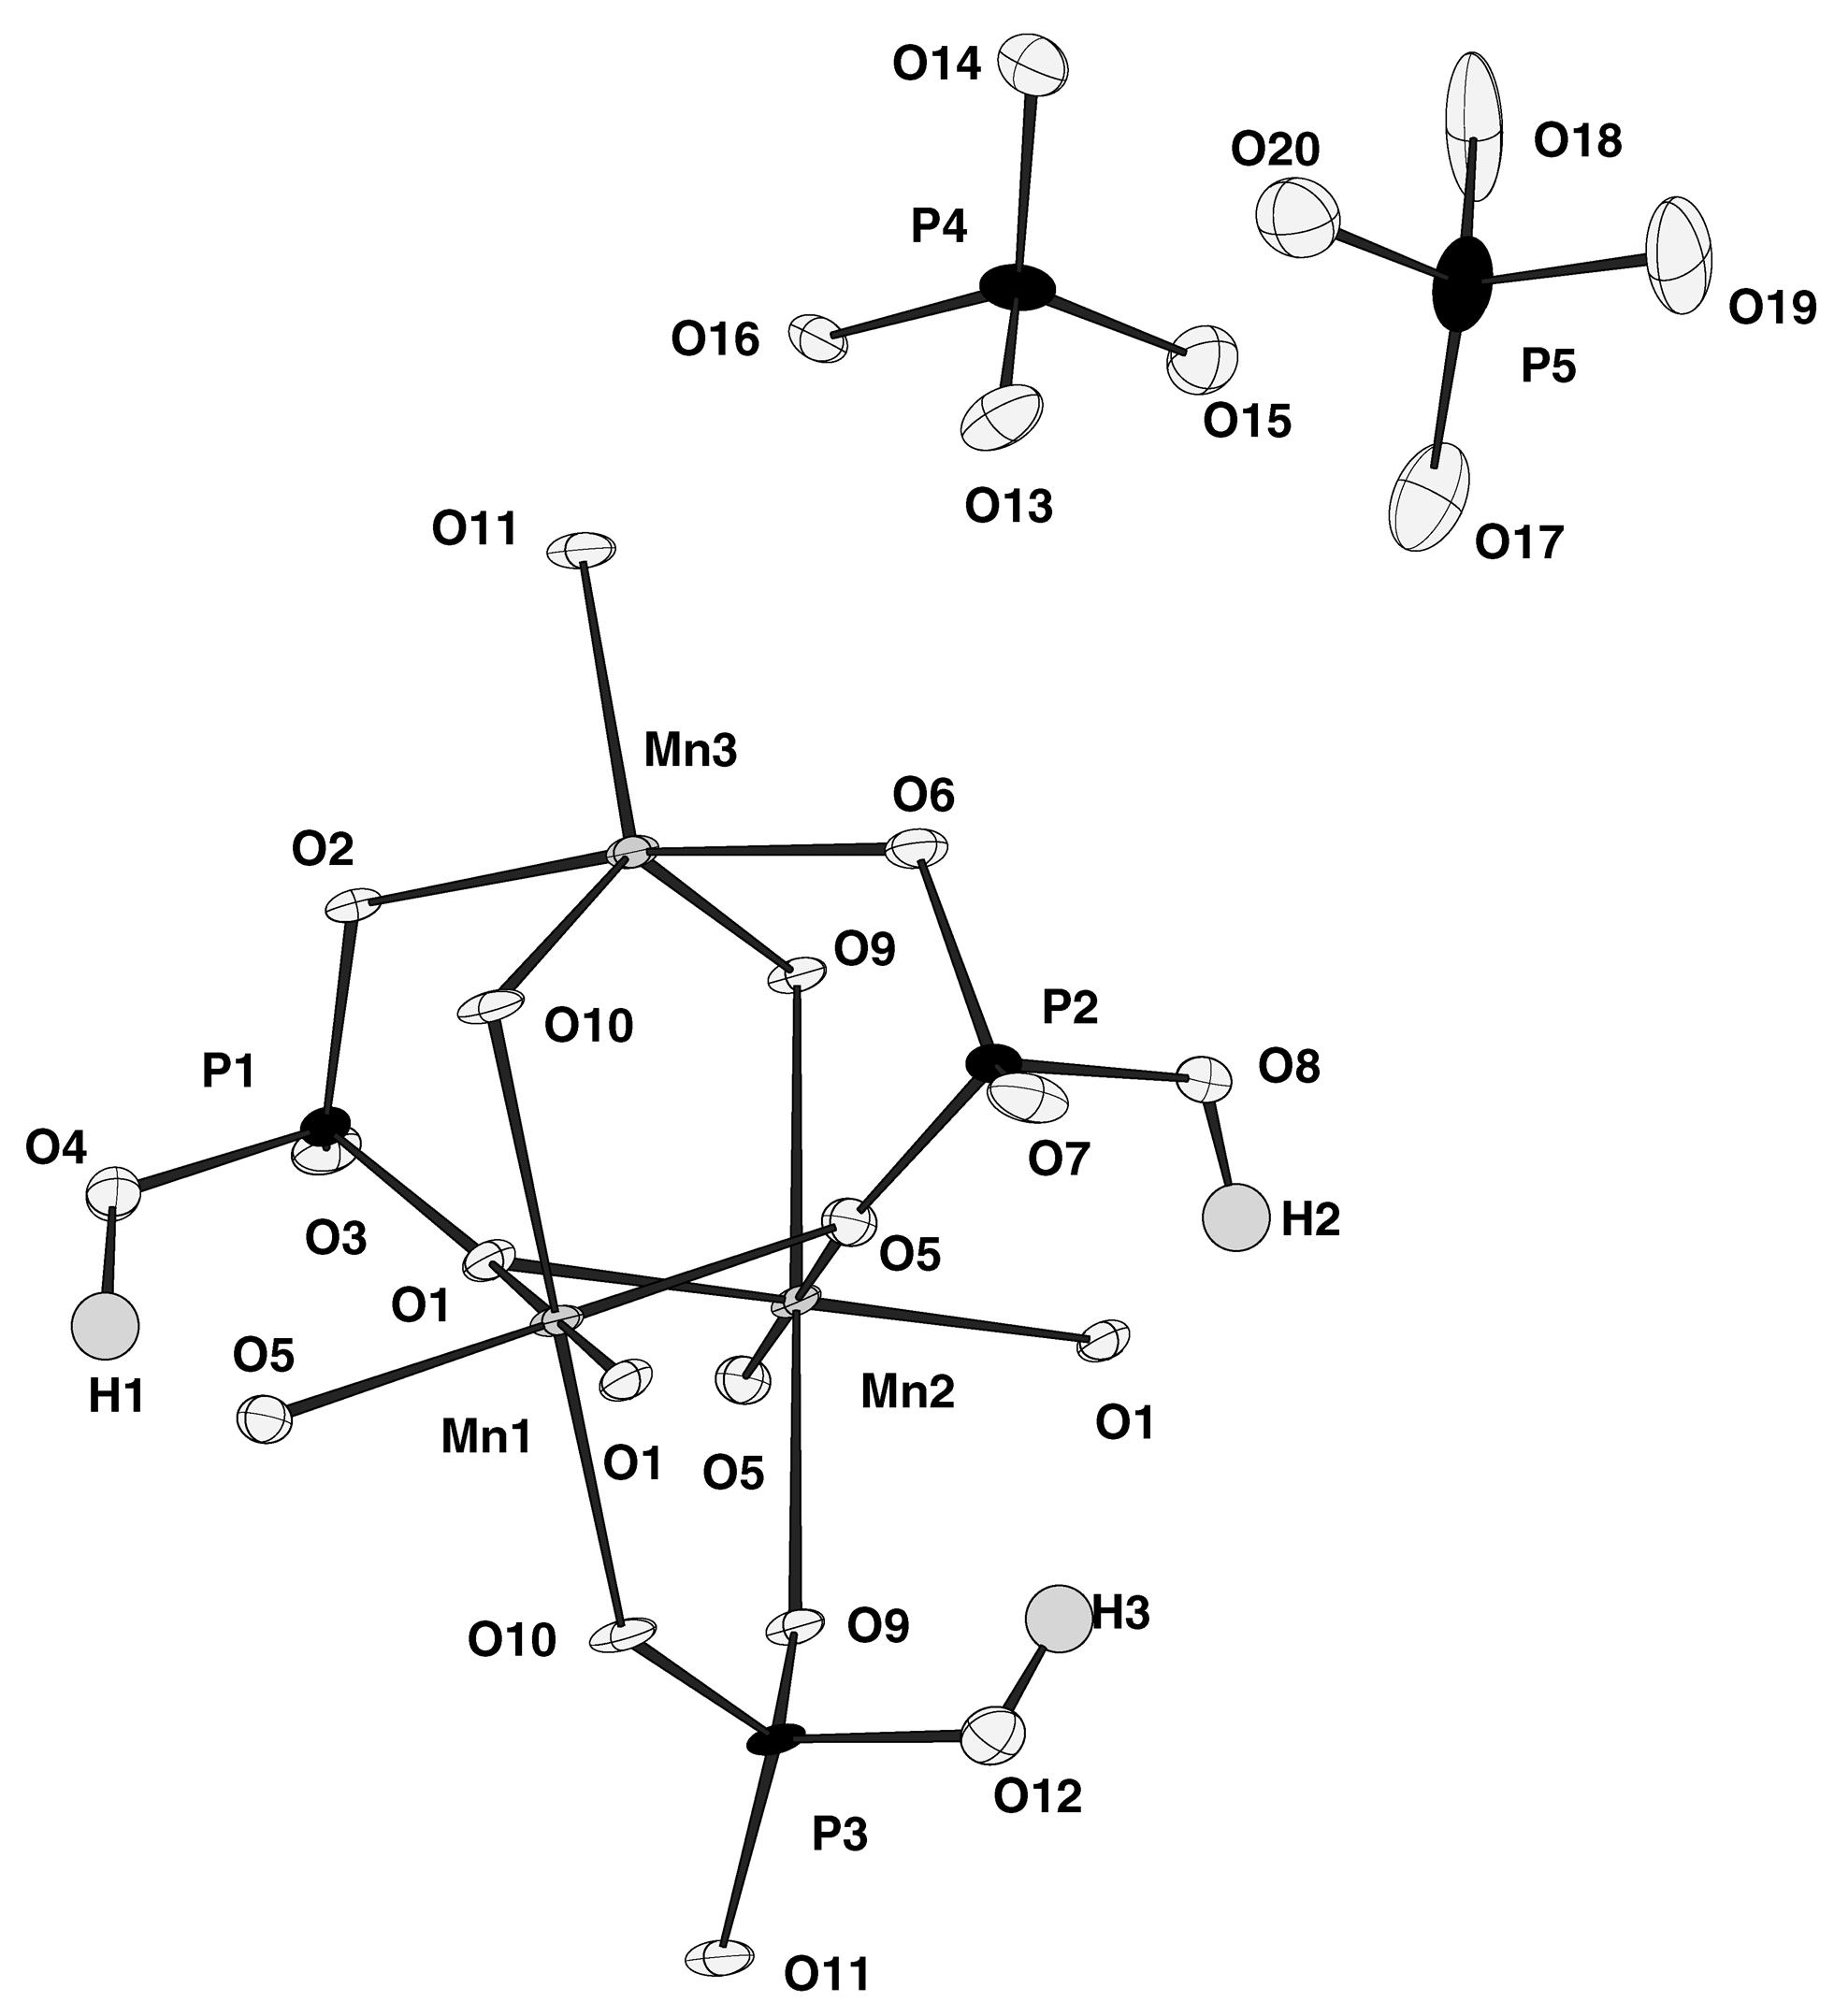
**Fig. S1** Thermal ellipsoids at 50% probability for the manganese complex cation and phosphate anions
