# Supplementary material
Source: Royal Society of Chemistry journal article supplement (doi:10.1039/b104491p), 2001-10-29
Supplement: b104491p(2).doc [file b104491p%282%29.doc]

**Fig. S2** Thermal ellipsoids at 50% probability for the ethylenediammonium cations
